# Supplementary material
Source: PubMed Central journal article supplement (PMC3989657)
Supplement: embj0033-0648-sd14.pdf [file embj0033-0648-sd14.pdf]

## SUPPLEMENTARY FIGURE S7

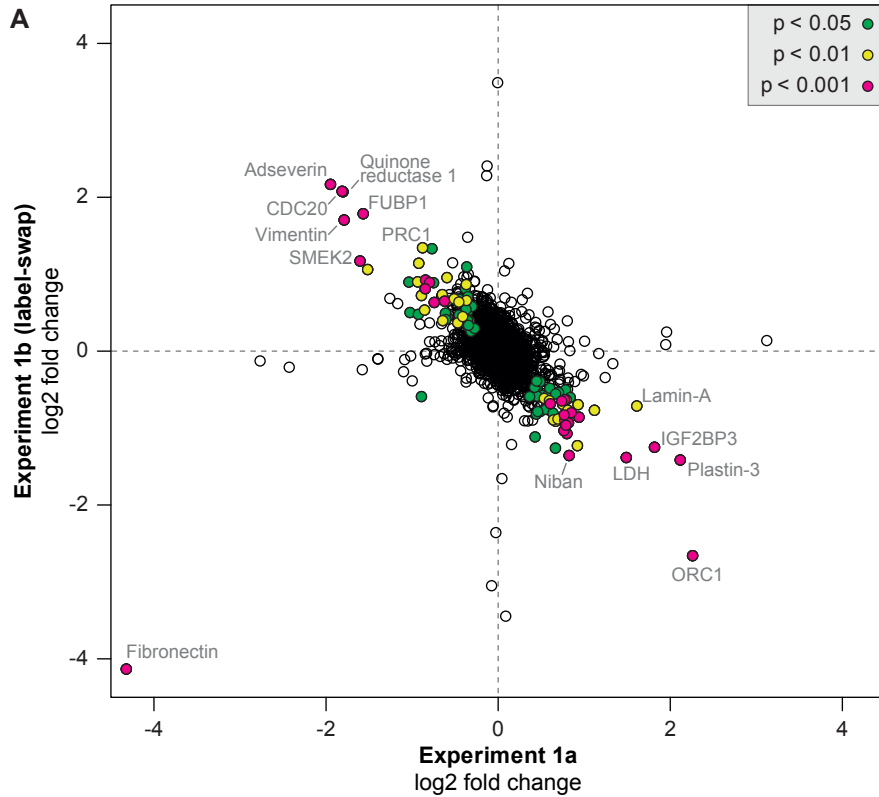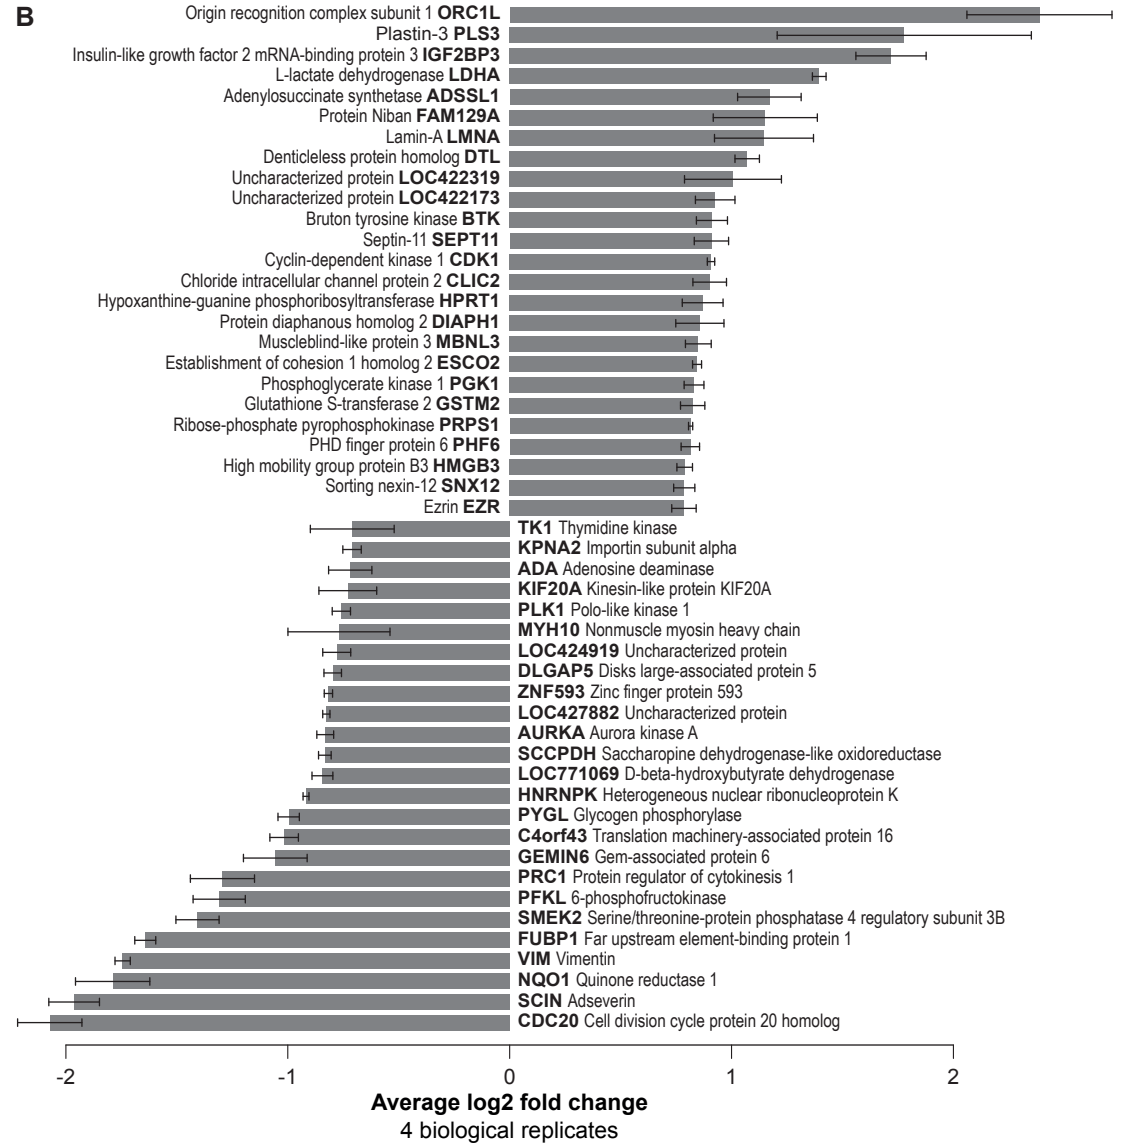

**Supplementary Figure S7. A quantitative proteomics screen for Cdk regulation of interphase chromatin. a,** SILAC ratios of 2046 proteins quantified in two of the total four biological replicate experiments. Filled circles represent statistically significant outliers, including the positive control Orc1. The label-swap control identifies fibronectin as unlabelled external contaminant. **b,** The 25 most highly up- or downregulated proteins across the four experiments. Error bars show the standard error of the mean. All proteins are significantly changed ( $p < 0.05$ ) in at least three of four replicates.
